# Supplementary material
Source: Springer Nature journal article supplement (https://www.springermedizin.de/resource/supplementary/12885_2009_1949_MOESM4_ESM.pdf/9460162)
Supplement: MOESM4 [file 9460162]

## Concordance between first diagnosis and the expert review

Table 2: **Concordance analysis**

| <i>Concordance</i>                    | <b>Zero</b> | <b>Partial</b> | <b>Full</b> | <b><i>p</i></b> |
|---------------------------------------|-------------|----------------|-------------|-----------------|
| Included tumors                       | 70 (100%)   | 97 (100%)      | 199 (100%)  |                 |
| <b><i>Type of laboratory</i></b>      |             |                |             |                 |
| <b>Public</b>                         | 17 (16.8%)  | 28 (27.7%)     | 56 (55.4%)  | <b>0.78</b>     |
| <b>Private</b>                        | 53 (20%)    | 69 (26.%)      | 143 (54%)   |                 |
| <i>Concordance</i>                    | <b>Zero</b> | <b>Partial</b> | <b>Full</b> | <b><i>p</i></b> |
| Included tumors                       | 70          | 97             | 97          |                 |
| <b><i>Type of tumor sample</i></b>    |             |                |             |                 |
| <b>Biopsy</b>                         | 16 (17.2%)  | 23 (24.7%)     | 54 (58.1%)  | <b>0.70</b>     |
| <b>Surgical specimen</b>              | 54 (19.8%)  | 74 (27.1%)     | 145 (53.1%) |                 |
| <i>Concordance</i>                    | <b>Zero</b> | <b>Partial</b> | <b>Full</b> | <b><i>p</i></b> |
| Included tumors                       | 44          | 81             | 134         |                 |
| <b><i>Grade</i></b>                   |             |                |             |                 |
| <b>I</b>                              | 9 (10.6%)   | 21 (24.7%)     | 55 (64.7%)  | <b>0.01</b>     |
| <b>II-III</b>                         | 35 (20.1%)  | 60 (34.5%)     | 79 (45.4%)  |                 |
| <i>Concordance</i>                    | <b>Zero</b> | <b>Partial</b> | <b>Full</b> | <b><i>p</i></b> |
| Included tumors                       | 67          | 97             | 199         |                 |
| <b><i>Molecular biology study</i></b> |             |                |             |                 |
| <b>No</b>                             | 45 (20%)    | 61 (26.%)      | 127 (54%)   | <b>0.84</b>     |
| <b>Yes</b>                            | 23(17.6%)   | 36 (27.5%)     | 72 (55.0%)  |                 |
